# Supplementary material
Source: bioRxiv or medRxiv preprint supplement (https://www.biorxiv.org/highwire/filestream/75909/field_highwire_adjunct_files/5/241760-6.pdf)

**a**

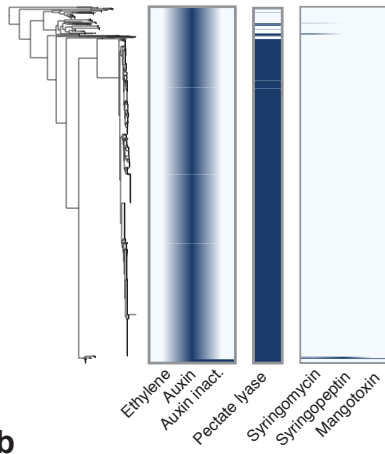

**b**

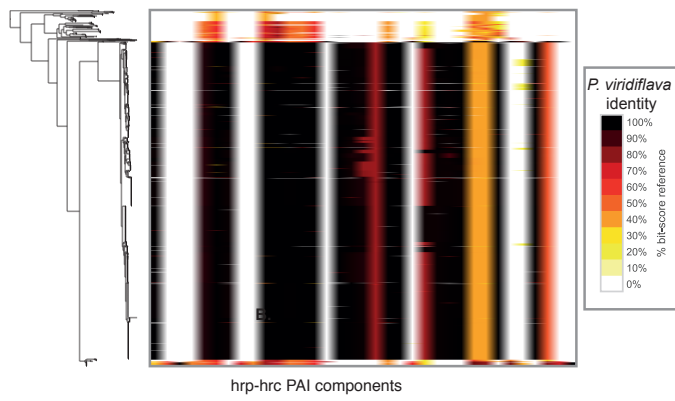

Supplement: Supplementary file [file 241760-6.pdf]
